# Supplementary material
Source: MDPI journal article supplement (https://www.mdpi.com/2504-446X/5/2/52)
Supplement: s1 [file s1]

# Flying Free: A Research Overview of Drone Navigation Autonomy

Thomas Lee <sup>1</sup>, Susan McKeever <sup>2</sup> and Jane Courtney <sup>1,\*</sup>

<sup>1</sup> School of Electronic and Electrical Engineering, Technological University Dublin, Dublin, Ireland; thomas.lee@tudublin.ie

<sup>2</sup> School of Computer Science, Technological University Dublin, Dublin, Ireland; susan.mckeever@tudublin.ie

\* Correspondence: Correspondence: jane.courtney@tudublin.ie

**Table S1.** Drone Autonomy Research Overview Rubric Sorted by Number of Citations/ Year.

| Paper                  | Cit | Year | Performance (at given task) |          |            | Awareness |     |     | Basic Navigation |     |     | Advanced Navigation |     |     | Engineering |     |     |
|------------------------|-----|------|-----------------------------|----------|------------|-----------|-----|-----|------------------|-----|-----|---------------------|-----|-----|-------------|-----|-----|
|                        |     |      | F1                          | Accuracy | Efficiency | SE        | ODE | ODi | AM               | CA  | ATL | PG                  | ED  | NPM | OBP         | ES  | SI  |
| A.Loquercio et al.     | 34  | 2020 |                             |          |            | No        | No  | Yes | Yes              | Yes | No  | No                  | No  | Yes | Yes         | Yes | Yes |
| M.K.Al Sharman et al.  | 11  | 2020 |                             |          |            | No        | No  | No  | No               | Yes | No  | No                  | No  | No  | No          | Yes | No  |
| S.Nezami et al.        | 8   | 2020 |                             | 98.3%    |            | No        | No  | Yes | No               | No  | No  | No                  | Yes | No  | No          | No  | No  |
| H.Shiri et al.         | 6   | 2020 |                             |          |            | No        | No  | No  | No               | No  | No  | Yes                 | No  | No  | No          | No  | No  |
| K.Lee et al.           | 6   | 2020 |                             |          | 80ms       | No        | No  | No  | Yes              | Yes | No  | Yes                 | No  | Yes | No          | Yes | No  |
| A.Anwar et al.         | 5   | 2020 |                             |          |            | No        | No  | No  | Yes              | Yes | No  | No                  | No  | No  | No          | Yes | No  |
| R.Chew et al.          | 4   | 2020 | 0.86                        | 86.0%    |            | No        | No  | Yes | No               | No  | No  | No                  | Yes | No  | No          | Yes | No  |
| I.Roldan et al.        | 4   | 2020 |                             | 99.5%    |            | No        | No  | Yes | No               | No  | No  | No                  | No  | No  | No          | Yes | No  |
| Y.Liao et al.          | 3   | 2020 |                             | 97.8%    |            | Yes       | No  | Yes | No               | No  | No  | No                  | No  | No  | No          | Yes | No  |
| Y.Wang et al.          | 1   | 2020 |                             |          |            | No        | Yes | No  | Yes              | Yes | No  | Yes                 | No  | No  | No          | No  | No  |
| I.Bozcan et al.        | 1   | 2020 | 0.9907                      |          |            | No        | No  | Yes | No               | No  | No  | No                  | No  | No  | No          | No  | No  |
| L.Messina et al.       | 1   | 2020 |                             |          |            | Yes       | No  | No  | Yes              | Yes | No  | No                  | No  | No  | No          | Yes | No  |
| B.Li et al.            | 0   | 2020 |                             | 90.0%    |            | No        | No  | Yes | No               | No  | No  | No                  | No  | No  | No          | Yes | No  |
| J.Tan et al.           | 0   | 2020 | 0.8886                      | 90.0%    |            | No        | No  | No  | No               | Yes | No  | No                  | No  | No  | No          | No  | No  |
| M.Gao et al.           | 0   | 2020 |                             |          |            | No        | No  | No  | No               | No  | No  | Yes                 | No  | No  | No          | Yes | No  |
| R.Yang et al.          | 0   | 2020 |                             | 96.0%    |            | No        | No  | Yes | No               | No  | No  | No                  | No  | No  | No          | Yes | No  |
| K.Menfoukh et al.      | 0   | 2020 | 0.85                        | 91.0%    |            | No        | No  | Yes | Yes              | Yes | No  | No                  | No  | No  | No          | Yes | No  |
| V.Sadhu et al.         | 0   | 2020 |                             |          |            | No        | No  | Yes | No               | No  | No  | No                  | No  | No  | No          | No  | No  |
| R.Raman et al.         | 0   | 2020 |                             |          |            | No        | No  | No  | No               | Yes | No  | No                  | No  | No  | No          | Yes | No  |
| B.Hosseiny et al.      | 0   | 2020 | 0.855                       | 90.9%    |            | No        | No  | Yes | No               | No  | No  | No                  | Yes | No  | No          | Yes | No  |
| R.I.Marasigan et al.   | 0   | 2020 |                             |          |            | No        | No  | No  | No               | No  | No  | No                  | No  | No  | Yes         | Yes | No  |
| M.Irfan et al.         | 0   | 2020 |                             |          |            | Yes       | No  | No  | Yes              | Yes | No  | No                  | No  | No  | No          | No  | No  |
| V.A.Bakale et al.      | 0   | 2020 |                             |          | 92s        | Yes       | Yes | No  | No               | Yes | No  | Yes                 | No  | No  | No          | Yes | No  |
| L.O.Rojas Perez et al. | 0   | 2020 |                             |          | 25.4ms     | No        | No  | Yes | Yes              | Yes | No  | No                  | No  | Yes | No          | Yes | No  |
| D.Wofk et al.          | 55  | 2019 |                             | 77.1%    | 37ms       | Yes       | No  | No  | No               | No  | No  | No                  | No  | No  | Yes         | Yes | Yes |

|                          |     |      |        |        |        |     |     |     |     |     |     |     |     |     |     |     |     |
|--------------------------|-----|------|--------|--------|--------|-----|-----|-----|-----|-----|-----|-----|-----|-----|-----|-----|-----|
| E.Kaufmann et al.        | 50  | 2019 |        |        | 100ms  | No  | No  | Yes | Yes | Yes | No  | Yes | No  | Yes | Yes | Yes | Yes |
| D.Palossi et al.         | 43  | 2019 | 0.821  | 89.1%  | 55.5ms | Yes | Yes | No  | Yes | Yes | No  | No  | No  | No  | Yes | Yes | Yes |
| Hossain et al.           | 19  | 2019 |        |        |        | No  | No  | Yes | No  | No  | No  | No  | No  | No  | Yes | Yes | Yes |
| Y.Y.Munaye et al.        | 11  | 2019 |        | 98.0%  |        | No  | No  | Yes | No  | Yes | No  |
| S.Islam et al.           | 9   | 2019 |        | 80.0%  |        | No  | No  | No  | No  | Yes | No  | Yes | No  | No  | No  | No  | No  |
| A.Alshehri et al.        | 8   | 2019 |        | 80.2%  |        | No  | No  | Yes | No  | Yes | No  |
| M.A.Akhloufi et al.      | 8   | 2019 |        |        | 33ms   | No  | No  | Yes | Yes | No  | No  | No  | No  | Yes | No  | Yes | No  |
| A.G.Perera et al.        | 6   | 2019 |        | 75.9%  |        | No  | No  | Yes | No  | Yes | No  |
| X.Han et al.             | 4   | 2019 |        | 88.0%  |        | No  | No  | No  | No  | Yes | No  |
| D.R.Hartawan et al.      | 4   | 2019 |        | 100.0% | 330ms  | No  | No  | Yes | No  | No  | No  | No  | Yes | No  | No  | Yes | No  |
| G.Muñoz et al.           | 4   | 2019 |        |        |        | No  | No  | No  | Yes | Yes | No  | No  | No  | Yes | No  | Yes | No  |
| Mohammadi et al.         | 4   | 2019 |        |        |        | Yes | No  | Yes | No  | Yes | No  |
| A.Garcia et al.          | 3   | 2019 |        | 98.0%  | 45ms   | No  | No  | No  | Yes | Yes | No  | No  | No  | No  | No  | Yes | No  |
| S.Shin et al.            | 3   | 2019 |        |        |        | No  | Yes | No  | Yes | Yes | No  | No  | No  | Yes | No  | Yes | No  |
| S.Y.Shin et al.          | 2   | 2019 |        |        |        | Yes | No  | No  | Yes | Yes | No  | Yes | No  | Yes | No  | No  | No  |
| A.Garcia et al.          | 1   | 2019 |        |        |        | No  | No  | Yes | Yes | Yes | No  | No  | No  | No  | No  | Yes | No  |
| L.Liu et al.             | 1   | 2019 |        |        |        | No  | No  | Yes | No  | No  | No  | Yes | No  | No  | No  | No  | No  |
| J.A.Cocoma Ortega et al. | 0   | 2019 |        | 95.0%  |        | No  | No  | Yes | Yes | Yes | No  | No  | No  | No  | Yes | Yes | Yes |
| M.T.Matthews et al.      | 0   | 2019 |        |        |        | No  | No  | No  | Yes | No  | No  | No  | No  | No  | No  | Yes | No  |
| J.Morais et al.          | 0   | 2019 |        |        |        | No  | No  | No  | Yes | No  | No  | Yes | No  | No  | No  | Yes | No  |
| A.Garrell et al.         | 0   | 2019 |        | 75.8%  |        | No  | No  | Yes | Yes | Yes | No  | No  | No  | No  | No  | Yes | No  |
| E.Cetin et al.           | 0   | 2019 |        |        |        | No  | No  | No  | Yes | Yes | No  | No  | No  | No  | No  | Yes | No  |
| A.Loquercio et al.       | 158 | 2018 | 0.901  | 95.4%  | 50ms   | Yes | Yes | No  | Yes | Yes | No  | No  | No  | No  | No  | Yes | No  |
| E.Kaufmann et al.        | 60  | 2018 |        |        | 100ms  | No  | No  | Yes | Yes | Yes | No  | No  | No  | No  | Yes | Yes | Yes |
| O.Csillik et al.         | 58  | 2018 | 0.9624 | 96.2%  |        | No  | No  | Yes | No  | No  | No  | No  | Yes | No  | No  | Yes | No  |
| S.Jung et al.            | 57  | 2018 |        | 75.5%  | 34ms   | No  | No  | Yes | Yes | No  | No  | No  | No  | Yes | Yes | Yes | Yes |
| A.A.Zhilenkov et al.     | 23  | 2018 |        |        |        | Yes | No  | No  | Yes | Yes | No  | No  | Yes | No  | Yes | Yes | Yes |
| S.Lee et al.             | 14  | 2018 |        |        |        | No  | No  | Yes | No  | No  | Yes | No  | No  | Yes | Yes | Yes | Yes |
| S.Dionisio Ortega et al. | 14  | 2018 |        |        |        | No  | Yes | No  | Yes | Yes | No  | No  | Yes | No  | No  | Yes | No  |
| Y.Feng et al.            | 13  | 2018 |        |        |        | No  | No  | Yes | No  | No  | Yes | No  | No  | Yes | No  | Yes | No  |
| N.Mohajerin et al.       | 13  | 2018 |        |        |        | No  | No  | No  | Yes | No  | No  | No  | No  | No  | No  | Yes | Yes |
| A.Carrio et al.          | 13  | 2018 |        | 98.0%  | 50ms   | No  | No  | No  | No  | No  | Yes | No  | No  | No  | No  | No  | No  |
| A.Rodriguez Ramos et al. | 12  | 2018 |        | 78.6%  |        | No  | No  | Yes | Yes | No  | Yes | No  | Yes | Yes | No  | Yes | No  |
| M.Jafari et al.          | 11  | 2018 |        |        |        | No  | No  | No  | No  | Yes | No  | No  | No  | No  | No  | Yes | No  |

|                           |     |      |       |        |  |     |     |     |     |     |     |     |     |     |     |     |     |
|---------------------------|-----|------|-------|--------|--|-----|-----|-----|-----|-----|-----|-----|-----|-----|-----|-----|-----|
| M.A.Anwar et al.          | 11  | 2018 |       |        |  | Yes | Yes | No  | Yes | Yes | No  | No  | No  | No  | No  | Yes | No  |
| A.Khan et al.             | 10  | 2018 | 78.0% |        |  | No  | No  | No  | Yes | Yes | No  | Yes | No  | No  | No  | Yes | No  |
| Y.Xu et al.               | 7   | 2018 |       |        |  | No  | No  | Yes | No  | No  | Yes | No  | No  | Yes | No  | Yes | No  |
| I.A.Sulistijono et al.    | 6   | 2018 | 84.1% | 450ms  |  | No  | No  | Yes | No  | Yes | No  |
| J.Shin et al.             | 6   | 2018 |       |        |  | Yes | No  | Yes | No  |
| S.P.Yong et al.           | 5   | 2018 | 0.731 | 97.3%  |  | No  | No  | Yes | No  | No  | No  | No  | Yes | No  | No  | Yes | Yes |
| C.Beleznai et al.         | 3   | 2018 |       | 50ms   |  | Yes | No  | Yes | No  | No  | No  | No  | No  | No  | Yes | No  | Yes |
| H.U.Dike et al.           | 3   | 2018 | 86.5% | 86.6ms |  | No  | No  | Yes | No  | Yes | Yes |
| X.Guan et al.             | 3   | 2018 |       |        |  | Yes | No  | No  | No  | Yes | No  |
| Y.Liu et al.              | 3   | 2018 |       |        |  | No  | No  | No  | No  | Yes | No  | No  | No  | No  | No  | Yes | No  |
| X.Dai et al.              | 1   | 2018 |       |        |  | No  | No  | No  | No  | Yes | No  |
| J.M.S Lagmay et al.       | 1   | 2018 |       |        |  | No  | No  | No  | Yes | Yes | No  | No  | No  | No  | No  | Yes | No  |
| X.Chen et al.             | 0   | 2018 | 95.0% | 50ms   |  | No  | No  | No  | No  | Yes | Yes | No  | No  | Yes | No  | No  | No  |
| D.Gandhi et al.           | 165 | 2017 |       |        |  | No  | Yes | No  | Yes | Yes | No  | No  | No  | No  | No  | Yes | No  |
| D.Falanga et al.          | 98  | 2017 | 80.0% | 0.24ms |  | No  | No  | No  | Yes | Yes | No  | Yes | No  | Yes | Yes | No  | Yes |
| K.McGuire et al.          | 88  | 2017 |       |        |  | Yes | No  | No  | Yes | Yes | No  | No  | No  | No  | Yes | No  | Yes |
| A.Zeggada et al.          | 43  | 2017 | 82.7% | 39ms   |  | No  | No  | Yes | No  | Yes | No  |
| Y.Zhao et al.             | 31  | 2017 |       |        |  | No  | No  | No  | No  | No  | No  | Yes | No  | No  | No  | No  | No  |
| L.Von et al.              | 25  | 2017 |       |        |  | Yes | Yes | No  |
| P.Moriarty et al.         | 11  | 2017 | 98.5% |        |  | No  | No  | Yes | No  | No  | Yes | No  | Yes | Yes | No  | Yes | No  |
| Y.F.Teng et al.           | 11  | 2017 |       |        |  | No  |
| Y.Zhou et al.             | 3   | 2017 |       |        |  | No  | No  | No  | No  | Yes | No  |
| A.Garcia et al.           | 3   | 2017 | 90.0% |        |  | Yes | No  | No  | Yes | No  | No  | No  | No  | No  | No  | Yes | No  |
| Y.Choi et al.             | 1   | 2017 | 98.9% |        |  | No  | No  | Yes | No  | No  | No  | No  | No  | Yes | No  | No  | No  |
| Y.Zhang et al.            | 1   | 2017 | 83.0% |        |  | No  | Yes | Yes | No  | Yes | No  |
| S.Andropov et al.         | 0   | 2017 |       |        |  | No  | No  | No  | Yes | No  | No  | No  | No  | No  | No  | Yes | No  |
| A.Giusti et al.           | 424 | 2016 |       |        |  | No  | No  | Yes | Yes | Yes | No  | No  | No  | No  | No  | Yes | No  |
| T.Zhang et al.            | 263 | 2016 |       |        |  | No  | No  | No  | Yes | Yes | No  | No  | No  | No  | Yes | Yes | No  |
| S.Daftry et al.           | 26  | 2016 | 78.0% |        |  | Yes | No  | No  | Yes | Yes | No  |
| M.E.Antonio Toledo et al. | 3   | 2016 |       |        |  | No  | No  | No  | No  | No  | No  | Yes | No  | Yes | No  | Yes | No  |

**Author's Note:** For the sake of readability, the various features in each section have been abbreviated in line with the display tables in the research overview, the legend for these abbreviations can be found in Table S2 below, further definition of these features are found in Section 2 and Section 3 of the main text.

**Table S2.** Abbreviation legend for Autonomous Features.

| Awareness |                    | Basic Navigation |                     | Expanded Navigation |                           | Engineering |                     |
|-----------|--------------------|------------------|---------------------|---------------------|---------------------------|-------------|---------------------|
| Abbrev.   | Feature            | Abbrev.          | Feature             | Abbrev.             | Feature                   | Abbrev.     | Feature             |
| SE        | Spatial Evaluation | AM               | Autonomous Movement | PG                  | Path Generation           | OBP         | On Board Processing |
| ODe       | Object Detection   | CA               | Collision Avoidance | ED                  | Environmental Distinction | ES          | Extra Sensory       |

---

|     |                       |     |                          |     |                        |    |                       |
|-----|-----------------------|-----|--------------------------|-----|------------------------|----|-----------------------|
| ODi | Object<br>Distinction | ATL | Auto Take<br>off/Landing | NPM | Non Planar<br>Movement | SI | Signal<br>Independent |
|-----|-----------------------|-----|--------------------------|-----|------------------------|----|-----------------------|

---
